# Supplementary material for: A Novel and Efficient Platform for Discovering Noncanonical Quorum-Quenching Proteins
Source: PubMed Central journal article supplement (PMC9927378; doi:10.1128/spectrum.03437-22), 2022-12-07
Supplement: spectrum.03437-22-s0001.pdf [file spectrum.03437-22-s0001.pdf]

1 **Supplementary Information**

2

3 **A novel and efficient platform for discovering non-canonical quorum-quenching**  
4 **proteins**

5 Jinxing Liao<sup>a</sup>, Zihan Li<sup>a</sup>, Dan Xiong<sup>a</sup>, Danyu Shen<sup>a</sup>, Lu Wang<sup>b</sup>, Xiaolong Shao<sup>a</sup>, Tao  
6 Li<sup>c\*</sup>, Guoliang Qian<sup>a\*</sup>

7

8

9 This file contains 4 supplemental tables and 17 supplemental figures.

1 **Table S1 Gene candidates identified in *L. enzymogenes* for quenching AHL quorum sensing**

| Gene ID | Functional annotation                                                           |
|---------|---------------------------------------------------------------------------------|
| Le0007  | heparinase III protein [Pedobacter heparinus]                                   |
| Le0012  | hypothetical protein [Rudaea cellulositytica]                                   |
| Le0022  | NA                                                                              |
| Le0040  | NA                                                                              |
| Le0060  | hypothetical protein [Dyella japonica]                                          |
| Le0081  | Muramidase-2 [Stenotrophomonas maltophilia]                                     |
| Le0095  | hypothetical protein [Variovorax paradoxus EPS, Varpa_3397]                     |
| Le0096  | low temperature requirement A protein LtrA [Cellvibrio sp. BR]                  |
| Le0100  | NA                                                                              |
| Le0101  | hypothetical protein [Dyella japonica]                                          |
| Le0138  | hypothetical protein [Xanthomonas axonopodis]                                   |
| Le0139  | hypothetical protein [Chondromyces apiculatus Myxococcus sp.]                   |
| Le0141  | hypothetical protein [Xanthomonas sp. SHU308]                                   |
| Le0144  | putative membrane protein [Pseudomonas fluorescens SBW25]                       |
| Le0172  | hypothetical protein [Rhodanobacter thiooxydans]                                |
| Le0178  | NA                                                                              |
| Le0190  | GCN5 family acetyltransferase [Singulisphaera acidiphila]                       |
| Le0194  | NA                                                                              |
| Le0213  | conserved hypothetical protein [Azotobacter vinelandii]                         |
| Le0215  | hypothetical protein [Pseudomonas aeruginosa]                                   |
| Le0239  | pilus assembly protein [Stenotrophomonas maltophilia]                           |
| Le0273  | NA                                                                              |
| Le0284  | pilus assembly protein [Stenotrophomonas maltophilia]                           |
| Le0297  | peptide transporter [Singularimonas variicoloris]                               |
| Le0303  | hypothetical protein [Stenotrophomonas maltophilia]                             |
| Le0307  | unnamed protein product [Photorhabdus luminescens subsp. laumondii TTO1]        |
| Le0311  | glycosyl hydrolase [Stenotrophomonas maltophilia]                               |
| Le0315  | DeoR family transcriptional regulator [Xanthomonas sp. SHU199]                  |
| Le0345  | NA                                                                              |
| Le0387  | pyrroloquinoline quinone biosynthesis protein PqqB [Xanthomonas vesicatoria]    |
| Le0388  | pyrroloquinoline quinone biosynthesis protein PqqC [Xanthomonas campestris]     |
| Le0389  | coenzyme PQQ biosynthesis protein D [Xanthomonas sp. SHU308]                    |
| Le0525  | Alkyl hydroperoxide reductase AhpD [Wohlfahrtiimonas chitiniclastica]           |
| Le0533  | protein of unknown function DUF6 transmembrane [Haliangium ochraceum DSM 14365] |
| Le0612  | hypothetical protein [Stenotrophomonas maltophilia]                             |
| Le0622  | sugar transporter [Burkholderia pyrrocinia]                                     |
| Le0623  | hypothetical protein [Dyella ginsengisoli]                                      |
| Le0627  | hypothetical protein [Variovorax paradoxus]                                     |
| Le0633  | NA                                                                              |
| Le0661  | hypothetical protein [Coralloccoccus coralloides]                               |
| Le0662  | hypothetical protein [Coralloccoccus coralloides]                               |

|        |                                                                                                         |
|--------|---------------------------------------------------------------------------------------------------------|
| Le0695 | hypothetical protein [Achromobacter piechaudii]                                                         |
| Le0748 | aspartyl-asparaginyl beta-hydroxylase [Xanthomonas axonopodis]                                          |
| Le0753 | hypothetical protein [Alcanivorax dieselolei]                                                           |
| Le0754 | NA                                                                                                      |
| Le0797 | CAAX amino terminal protease [Burkholderia sp. CCGE1002]                                                |
| Le0840 | Acetyltransferase, GNAT family protein [Polymorphum gilvum SL003B-26A1]                                 |
| Le0866 | hypothetical protein [Arhodomonas aquaeolei]                                                            |
| Le0873 | NA                                                                                                      |
| Le0915 | Beta-lactamase [Azospirillum lipoferum]                                                                 |
| Le0923 | hypothetical protein [Pseudomonas geniculata]                                                           |
| Le0926 | hypothetical protein [Stenotrophomonas maltophilia]                                                     |
| Le0927 | lanthionine synthetase C-like protein [Lysobacter sp. ATCC 53042]                                       |
| Le0969 | GCN5-related N-acetyltransferase [Pseudomonas mendocina NK-01]                                          |
| Le0982 | NA                                                                                                      |
| Le1035 | acetyltransferase [Leptolyngbya sp. PCC 7375]                                                           |
| Le1036 | integral membrane-like protein [Pseudoxanthomonas suwonensis 11-1]                                      |
| Le1044 | NA                                                                                                      |
| Le1066 | NA                                                                                                      |
| Le1071 | hypothetical protein [Pseudomonas mandelii]                                                             |
| Le1072 | aerobic-type carbon monoxide dehydrogenase, large subunit CoxL/CutL-like protein [Pseudomonas sp. GM79] |
| Le1073 | (2Fe-2S)-binding protein [Pseudomonas fluorescens]                                                      |
| Le1074 | XshC-Cox1-family protein [Stenotrophomonas maltophilia]                                                 |
| Le1075 | CTP: molybdopterin cytidylyltransferase [Stenotrophomonas maltophilia]                                  |
| Le1077 | NA                                                                                                      |
| Le1079 | tetracenomycin polyketide synthesis O-methyltransferase TemP [Streptomyces himastatinicus ATCC 53653]   |
| Le1083 | Lysine exporter protein (LYSE/YGGA) [Ralstonia pickettii 12D]                                           |
| Le1092 | propeptide, PepSY and peptidase M4 [Nitrobacter sp. Nb-311A]                                            |
| Le1093 | NA                                                                                                      |
| Le1097 | D-alanyl-D-alanine dipeptidase [Rhodanobacter sp. 2APBS1]                                               |
| Le1100 | transglutaminase [Pseudoxanthomonas sp. GW2]                                                            |
| Le1111 | oxidoreductase [Xanthomonas campestris]                                                                 |
| Le1112 | putative ferredoxin protein [Xanthomonas albilineans GPE PC73]                                          |
| Le1116 | Uncharacterized metalloprotease [Stenotrophomonas maltophilia]                                          |
| Le1120 | hypothetical protein [Leeia oryzae]                                                                     |
| Le1122 | hypothetical protein [Leeia oryzae]                                                                     |
| Le1124 | NA                                                                                                      |
| Le1161 | putative transcriptional regulator [Xanthomonas sacchari]                                               |
| Le1164 | hypothetical protein [Burkholderia sp.]                                                                 |
| Le1168 | putative RNA polymerase sigma factor [Xanthomonas sacchari]                                             |
| Le1181 | conserved hypothetical protein [Xanthomonas campestris]                                                 |
| Le1195 | major facilitator superfamily protein [Rhodanobacter fulvus Jip2]                                       |

|        |                                                                                                           |
|--------|-----------------------------------------------------------------------------------------------------------|
| Le1196 | NA                                                                                                        |
| Le1198 | family 2 glycosyl transferase [ <i>Granulicella mallensis</i> ]                                           |
| Le1199 | hypothetical protein [ <i>Xanthomonas axonopodis</i> ]                                                    |
| Le1202 | NA                                                                                                        |
| Le1204 | NA                                                                                                        |
| Le1205 | N-acetylmuramyl-L-alanine amidase, negative regulator of AmpC, AmpD [ <i>Niastella koreensis</i> ]        |
| Le1206 | NA                                                                                                        |
| Le1208 | NA                                                                                                        |
| Le1210 | 3-carboxymuconate cyclase [ <i>Pseudomonas</i> sp. GM17]                                                  |
| Le1222 | hypothetical protein [ <i>Rhodanobacter spathiphylli</i> ]                                                |
| Le1273 | ABC transporter substrate-binding protein [ <i>Stenotrophomonas maltophilia</i> ]                         |
| Le1305 | conserved hypothetical protein [ <i>Methylococcus capsulatus</i> ]                                        |
| Le1319 | NA                                                                                                        |
| Le1321 | hypothetical protein HMPREF0995_05895, partial [ <i>Lachnospiraceae</i> bacterium 7_1_58FAA]              |
| Le1372 | cupin domain-containing protein [ <i>Rhodanobacter</i> sp. 116-2]                                         |
| Le1373 | ArsR family transcriptional regulator [ <i>Burkholderia</i> sp. JPY251]                                   |
| Le1378 | NA                                                                                                        |
| Le1379 | hypothetical protein [ <i>Variovorax paradoxus</i> ]                                                      |
| Le1383 | putative esterase of the alpha-beta hydrolase superfamily [ <i>Deinococcus peraridilitoris</i> DSM 19664] |
| Le1388 | putative protease [ <i>Pectobacterium carotovorum</i> subsp. <i>carotovorum</i> PCC21]                    |
| Le1391 | 4-oxalocrotonate tautomerase [ <i>Achromobacter piechaudii</i> ]                                          |
| Le1394 | hypothetical protein [ <i>Rudaea cellulositytica</i> ]                                                    |
| Le1421 | GCN5-related N-acetyltransferase [ <i>Thioalkalivibrio sulfidophilus</i> HL-EbGr7]                        |
| Le1422 | NA                                                                                                        |
| Le1427 | hypothetical protein [ <i>Rudaea cellulositytica</i> ]                                                    |
| Le1458 | YadA domain protein [ <i>Burkholderia ambifaria</i> MEX-5]                                                |
| Le1463 | NA                                                                                                        |
| Le1495 | hypothetical protein [ <i>Streptomyces somaliensis</i> ]                                                  |
| Le1498 | hypothetical protein [ <i>Streptomyces</i> sp. FxanaD5]                                                   |
| Le1500 | NA                                                                                                        |
| Le1501 | Protein of unknown function (DUF3526) [ <i>Novosphingobium</i> sp. AP12]                                  |
| Le1504 | protein with peptidoglycan-binding domain [ <i>Psychroflexus torquis</i> ]                                |
| Le1505 | hypothetical protein [ <i>Myxococcus</i> sp. (contaminant ex DSM 436), A176_1024]                         |
| Le1540 | hypothetical protein CATMIT_01824, partial [ <i>Catenibacterium mitsuokai</i> DSM 15897]                  |
| Le1544 | NA                                                                                                        |
| Le1558 | methyltransferase [ <i>Stenotrophomonas maltophilia</i> ]                                                 |
| Le1566 | putative glycosyl transferase PsII [ <i>Pseudomonas fluorescens</i> A506]                                 |
| Le1567 | NA                                                                                                        |
| Le1568 | arabinose efflux permease family protein [ <i>Phyllobacterium</i> sp. YR531]                              |
| Le1570 | NA                                                                                                        |
| Le1574 | unknown [ <i>Lysobacter enzymogenes</i> ]                                                                 |
| Le1575 | unknown [ <i>Lysobacter enzymogenes</i> ]                                                                 |

|        |                                                                                      |
|--------|--------------------------------------------------------------------------------------|
| Le1577 | SctL [Lysobacter enzymogenes]                                                        |
| Le1578 | NA                                                                                   |
| Le1579 | unknown [Lysobacter enzymogenes]                                                     |
| Le1581 | unknown [Lysobacter enzymogenes]                                                     |
| Le1585 | PhaA [Lysobacter enzymogenes]                                                        |
| Le1589 | NA                                                                                   |
| Le1591 | type III secretion protein, HrpO family [Burkholderiales bacterium JOSHI_001]        |
| Le1594 | NA                                                                                   |
| Le1595 | hypothetical protein [gamma proteobacterium]                                         |
| Le1614 | NA                                                                                   |
| Le1615 | NA                                                                                   |
| Le1652 | relaxation protein [Xanthomonas campestris]                                          |
| Le1675 | transmembrane anti-sigma factor [Pseudomonas fluorescens]                            |
| Le1680 | putative protease with the C-terminal PDZ domain [Pseudoxanthomonas spadix BD-a59]   |
| Le1682 | probable glucans biosynthesis protein d precursor [Xanthomonas albilineans GPE PC73] |
| Le1689 | hypothetical protein [Dyella ginsengisoli]                                           |
| Le1691 | hypothetical protein [Dyella ginsengisoli]                                           |
| Le1694 | hypothetical protein [Rudaea cellulositytica]                                        |
| Le1695 | hypothetical protein [Rudaea cellulositytica]                                        |
| Le1702 | NA                                                                                   |
| Le1719 | NA                                                                                   |
| Le1723 | NA                                                                                   |
| Le1724 | hypothetical protein [Stenotrophomonas maltophilia]                                  |
| Le1740 | pyridine nucleotide-disulfide oxidoreductase [Pseudoxanthomonas suwonensis]          |
| Le1750 | NA                                                                                   |
| Le1753 | hypothetical protein [Enterobacter cloacae]                                          |
| Le1760 | peptidase C39 [Burkholderia pyrrocinia]                                              |
| Le1770 | NA                                                                                   |
| Le1792 | putative metal-dependent membrane protease [Xanthomonas axonopodis pv. citrumelo F1] |
| Le1806 | 2, 5-diketo-D-gluconic acid reductase [Variovorax paradoxus]                         |
| Le1810 | hypothetical protein [Delftia acidovorans]                                           |
| Le1822 | NA                                                                                   |
| Le1823 | NA                                                                                   |
| Le1837 | NA                                                                                   |
| Le1869 | putative integron gene cassette protein [uncultured bacterium]                       |
| Le1870 | streptomycin 3"-phosphotransferase [Achromobacter xylosoxidans C54]                  |
| Le1922 | NA                                                                                   |
| Le1965 | endoribonuclease L-PSP [Burkholderia multivorans]                                    |
| Le1966 | short chain fatty acid transporter [Stenotrophomonas maltophilia]                    |
| Le1982 | NA                                                                                   |
| Le1991 | heat shock protein Hsp70 [Xanthomonas gardneri]                                      |
| Le1999 | hypothetical protein [Xanthomonas vesicatoria]                                       |
| Le2006 | conserved hypothetical protein [Xanthomonas campestris]                              |

|        |                                                                                     |
|--------|-------------------------------------------------------------------------------------|
| Le2013 | NA                                                                                  |
| Le2014 | NA                                                                                  |
| Le2015 | NA                                                                                  |
| Le2017 | NA                                                                                  |
| Le2029 | RDD family protein [Cesiribacter andamanensis]                                      |
| Le2048 | kanamycin nucleotidyltransferase, partial [Catenibacterium mitsuokai DSM 15897]     |
| Le2071 | NA                                                                                  |
| Le2109 | NA                                                                                  |
| Le2143 | hypothetical protein [uncultured bacterium, ACD_23C00190G0001]                      |
| Le2145 | NA                                                                                  |
| Le2156 | GCN5 family acetyltransferase [Rhodanobacter fulvus]                                |
| Le2179 | conserved hypothetical protein [Ralstonia syzygii R24]                              |
| Le2180 | hypothetical protein [Dyella ginsengisoli]                                          |
| Le2185 | NA                                                                                  |
| Le2196 | membrane protein [Xanthomonas sacchari]                                             |
| Le2198 | NA                                                                                  |
| Le2199 | hypothetical protein [Gordonia polyisoprenivorans]                                  |
| Le2260 | polymerase [Stenotrophomonas maltophilia]                                           |
| Le2270 | N-acylglucosamine 2-epimerase [Stenotrophomonas maltophilia]                        |
| Le2274 | sugar hydrolase [Pseudomonas geniculata]                                            |
| Le2286 | conserved hypothetical protein [Stigmatella aurantiaca]                             |
| Le2288 | hypothetical protein [Acidovorax citrulli]                                          |
| Le2359 | putative iron transport/utilization related protein [Burkholderia xenovorans LB400] |
| Le2407 | glyoxalase/bleomycin resistance protein/dioxygenase [Rhodococcus triatomae]         |
| Le2417 | TetR family transcriptional regulator [Rhizobium leguminosarum]                     |
| Le2427 | trans-2-enoyl-CoA reductase [Xanthomonas campestris]                                |
| Le2450 | lanthionine synthetase [Stenotrophomonas maltophilia]                               |
| Le2521 | hypothetical protein [Herbaspirillum sp. JC206]                                     |
| Le2530 | hypothetical protein [Stenotrophomonas maltophilia]                                 |
| Le2531 | hypothetical protein [Xanthomonas sacchari]                                         |
| Le2540 | hypothetical protein [Bifidobacterium adolescentis]                                 |
| Le2552 | hypothetical protein [Pseudoxanthomonas sp. GW2]                                    |
| Le2572 | NA                                                                                  |
| Le2616 | hypothetical protein [Rudaea cellulositytica]                                       |
| Le2620 | NA                                                                                  |
| Le2627 | hypothetical protein, partial [Xanthomonas sp. SHU199]                              |
| Le2636 | conserved hypothetical exported protein [Stenotrophomonas maltophilia K279a]        |
| Le2649 | membrane protein [Stenotrophomonas maltophilia]                                     |
| Le2660 | hypothetical protein [Micromonospora sp.]                                           |
| Le2683 | glycerol kinase [Xanthomonas sp. SHU199]                                            |
| Le2685 | glycerol-3-phosphate dehydrogenase [Rhodanobacter sp. 115]                          |
| Le2703 | beta-lytic protease [Lysobacter sp. IB-9374]                                        |
| Le2716 | hypothetical protein [Rudaea cellulositytica]                                       |

|        |                                                                                                  |
|--------|--------------------------------------------------------------------------------------------------|
| Le2717 | Hemolysin-type calcium-binding repeat (2 copies) [Candidatus Chloracidobacterium thermophilum B] |
| Le2718 | NA                                                                                               |
| Le2719 | NA                                                                                               |
| Le2720 | NA                                                                                               |
| Le2726 | hypothetical protein [Variovorax sp. CF313, PMI12_00324]                                         |
| Le2727 | transcriptional regulator, AraC family [Variovorax paradoxus EPS]                                |
| Le2772 | NA                                                                                               |
| Le2784 | hypothetical protein [Rhodanobacter spathiphylli]                                                |
| Le2785 | hypothetical protein [Dyella ginsengisoli]                                                       |
| Le2790 | hemolysin-type calcium-binding protein [Clostridium cellulovorans]                               |
| Le2830 | 5-methyltetrahydropteroyltriglutamate--homocysteine methyltransferase [Xanthomonas translucens]  |
| Le2859 | NA                                                                                               |
| Le2871 | endoglucanase [Lysobacter sp. IB-9374]                                                           |
| Le2884 | conserved hypothetical protein [Variovorax paradoxus]                                            |
| Le2926 | lysine exporter protein [Azoarcus sp. KH32C]                                                     |
| Le2927 | NA                                                                                               |
| Le2933 | hypothetical protein [Stenotrophomonas maltophilia Ab55555, A1OC_03568]                          |
| Le2955 | NA                                                                                               |
| Le2980 | TetR family transcriptional regulator [Myxococcus stipitatus]                                    |
| Le2997 | NA                                                                                               |
| Le3002 | hypothetical protein [Xanthomonas translucens]                                                   |
| Le3019 | predicted phosphohydrolase [Hahella chejuensis]                                                  |
| Le3022 | hypothetical protein [Xanthomonas translucens]                                                   |
| Le3026 | hypothetical protein [Dyella japonica]                                                           |
| Le3046 | hypothetical protein [Stenotrophomonas maltophilia Ab55555, A1OC_03423]                          |
| Le3060 | cytochrome c, class I [Cupriavidus sp. HMR-1]                                                    |
| Le3062 | (2Fe-2S)-binding protein [Ralstonia sp. AU12-08]                                                 |
| Le3075 | Cupin 2 conserved barrel domain protein [Pseudomonas fulva]                                      |
| Le3100 | Rieske (2Fe-2S) domain-containing protein [Xanthomonas translucens]                              |
| Le3180 | NA                                                                                               |
| Le3194 | membrane protein [Achromobacter xylosoxidans]                                                    |
| Le3199 | NA                                                                                               |
| Le3201 | lysine transporter LysE [Mesorhizobium amorphae]                                                 |
| Le3202 | hypothetical protein [Roseomonas sp. B5]                                                         |
| Le3205 | hypothetical protein [Chryseobacterium taeanense]                                                |
| Le3211 | hypothetical protein [Uliginosibacterium gangwonense]                                            |
| Le3226 | lipolytic protein G-D-S-L [Collimonas fungivorans Ter331]                                        |
| Le3232 | 2-methylcitrate dehydratase [Rhodanobacter sp.]                                                  |
| Le3286 | MATE efflux family protein [Thauera sp. 63]                                                      |
| Le3290 | bleomycin resistance protein [Rhizobium sp. 42MFCr.1]                                            |
| Le3292 | hypothetical protein [Dyella ginsengisoli]                                                       |

|        |                                                                                                               |
|--------|---------------------------------------------------------------------------------------------------------------|
| Le3299 | putative methyltransferase [ <i>Xanthomonas campestris</i> ]                                                  |
| Le3300 | hypothetical protein [ <i>Xanthomonas</i> sp. SHU199]                                                         |
| Le3307 | inner membrane protein [ <i>Xanthomonas translucens</i> ]                                                     |
| Le3311 | hypothetical protein [ <i>Variovorax paradoxus</i> EPS, Varpa_1846]                                           |
| Le3316 | hypothetical protein [ <i>Xanthomonas arboricola</i> ]                                                        |
| Le3322 | TfoX domain-containing protein [ <i>Collimonas fungivorans</i> ]                                              |
| Le3330 | glyoxalase [ <i>Stenotrophomonas maltophilia</i> ]                                                            |
| Le3333 | hypothetical protein [ <i>Xanthomonas translucens</i> ]                                                       |
| Le3362 | hypothetical protein [ <i>Nodosilinea nodulosa</i> ]                                                          |
| Le3387 | NA                                                                                                            |
| Le3393 | hypothetical protein [ <i>Variovorax</i> sp.]                                                                 |
| Le3408 | putative transmembrane protein [ <i>Stenotrophomonas maltophilia</i> ]                                        |
| Le3429 | NAD(P)H dehydrogenase [ <i>Xanthomonas</i> sp. SHU199]                                                        |
| Le3452 | putative secreted protein [ <i>Stenotrophomonas maltophilia</i> D457]                                         |
| Le3466 | lactoylglutathione lyase [ <i>Dyella japonica</i> ]                                                           |
| Le3473 | phospholipase C, phosphocholine-specific [ <i>Pseudomonas aeruginosa</i> ]                                    |
| Le3474 | hypothetical protein [ <i>Klebsiella oxytoca</i> ]                                                            |
| Le3475 | hypothetical protein [ <i>Proteus penneri</i> ]                                                               |
| Le3476 | protein kinase/helix-hairpin-helix DNA-binding domain-containing protein [ <i>Salinisphaera shabanensis</i> ] |
| Le3480 | conserved hypothetical protein [ <i>Xanthomonas campestris</i> ]                                              |
| Le3483 | hypothetical protein [ <i>Xanthomonas axonopodis</i> ]                                                        |
| Le3491 | NA                                                                                                            |
| Le3508 | NA                                                                                                            |
| Le3518 | hypothetical protein [Acetobacteraceae bacterium]                                                             |
| Le3534 | protein of unknown function DUF336 [Candidatus <i>Solibacter usitatus</i> Ellin6076]                          |
| Le3541 | cytochrome C551 [ <i>Pseudoxanthomonas</i> sp. GW2]                                                           |
| Le3542 | hypothetical protein [ <i>Xanthomonas sacchari</i> ]                                                          |
| Le3554 | periplasmic glucan biosynthesis protein, MdoG [ <i>Roseomonas cervicalis</i> ATCC 49957]                      |
| Le3555 | Glucans biosynthesis glucosyltransferase H [ <i>Xanthomonas campestris</i> ]                                  |
| Le3595 | SMP-30/gluconolactonase/LRE-like region-containing protein [ <i>Pseudoxanthomonas suwonensis</i> ]            |
| Le3616 | NA                                                                                                            |
| Le3668 | NA                                                                                                            |
| Le3689 | hypothetical protein [ <i>Gemmata obscuriglobus</i> ]                                                         |
| Le3691 | hypothetical protein [ <i>Pseudomonas mendocina</i> ]                                                         |
| Le3704 | hypothetical protein [ <i>Xanthomonas axonopodis</i> ]                                                        |
| Le3714 | hypothetical protein [ <i>Dyella japonica</i> ]                                                               |
| Le3732 | NA                                                                                                            |
| Le3757 | hypothetical protein [ <i>Xanthomonas</i> sp. SHU199]                                                         |
| Le3760 | membrane protein [ <i>Xanthomonas campestris</i> ]                                                            |
| Le3811 | hemin storage protein [ <i>Stenotrophomonas maltophilia</i> ]                                                 |
| Le3812 | alpha-1, 2-mannosidase [ <i>Rhodanobacter thiooxydans</i> LCS2]                                               |
| Le3814 | NA                                                                                                            |



|        |                                                                                    |
|--------|------------------------------------------------------------------------------------|
| Le3815 | NA                                                                                 |
| Le3847 | hypothetical protein [Xanthomonas sacchari]                                        |
| Le3858 | putative phospholipase c precursor protein [Xanthomonas albilineans]               |
| Le3884 | NA                                                                                 |
| Le3904 | hypothetical protein [Janthinobacterium sp. CG3]                                   |
| Le3905 | MFS transporter [Serratia marcescens]                                              |
| Le3915 | hypothetical protein [Rubrivivax gelatinosus]                                      |
| Le3917 | endonuclease [Stenotrophomonas maltophilia]                                        |
| Le3925 | NA                                                                                 |
| Le3940 | NA                                                                                 |
| Le3944 | hypothetical protein [Candidatus Solibacter]                                       |
| Le3991 | hypothetical protein [Pseudoxanthomonas spadix]                                    |
| Le4025 | NA                                                                                 |
| Le4030 | NA                                                                                 |
| Le4067 | membrane protein [Pseudomonas chlororaphis]                                        |
| Le4071 | putative transmembrane protein [Stenotrophomonas maltophilia]                      |
| Le4074 | lysine exporter protein LysE/YggA [Pseudomonas sp. CF149]                          |
| Le4102 | hypothetical protein [Xanthomonas sp. SHU199]                                      |
| Le4115 | NA                                                                                 |
| Le4136 | conserved hypothetical protein [Xanthomonas citri]                                 |
| Le4138 | hypothetical protein [Xanthomonas fragariae]                                       |
| Le4141 | putative transcriptional regulator [Mesorhizobium metallidurans]                   |
| Le4163 | NA                                                                                 |
| Le4180 | hypothetical protein [Xanthomonas sacchari]                                        |
| Le4187 | NA                                                                                 |
| Le4199 | putative membrane protein [Mesorhizobium amorphae]                                 |
| Le4224 | hypothetical protein [Bifidobacterium adolescentis]                                |
| Le4225 | hypothetical protein BIFADO_01105, partial [Bifidobacterium adolescentis L2-32]    |
| Le4231 | NA                                                                                 |
| Le4252 | hypothetical protein [Methylobacterium radiotolerans]                              |
| Le4258 | hypothetical protein [Stenotrophomonas maltophilia]                                |
| Le4260 | sugar ABC transporter substrate-binding protein [Xanthomonas translucens]          |
| Le4261 | binding-protein-dependent transport systems inner membrane component               |
| Le4262 | sugar ABC transporter permease [Stenotrophomonas maltophilia]                      |
| Le4263 | hypothetical protein [Xanthomonas translucens]                                     |
| Le4272 | NA                                                                                 |
| Le4275 | MFS transporter [Dyella ginsengisoli]                                              |
| Le4301 | NA                                                                                 |
| Le4302 | NA                                                                                 |
| Le4306 | NAD(P)H dehydrogenase [Pseudomonas aeruginosa]                                     |
| Le4323 | Glyoxalase/bleomycin resistance protein/dioxygenase [Pseudoxanthomonas suwonensis] |
| Le4332 | hypothetical protein [Stenotrophomonas maltophilia]                                |
| Le4337 | NA                                                                                 |

|        |                                                                                 |
|--------|---------------------------------------------------------------------------------|
| Le4383 | hypothetical protein [Sphingobium sp.]                                          |
| Le4386 | membrane protein [Sphingobium lactosutens DS20]                                 |
| Le4387 | membrane protein [Stenotrophomonas maltophilia]                                 |
| Le4388 | hypothetical protein [alpha proteobacterium LLX12A]                             |
| Le4421 | hypothetical protein [Xanthomonas oryzae]                                       |
| Le4422 | copper resistance protein M [Xanthomonas alfalfae subsp. citrumelonis]          |
| Le4427 | NA                                                                              |
| Le4432 | FAD-binding 9 siderophore-interacting domain-containing protein                 |
| Le4467 | cycloisomaltooligosaccharide glucanotransferase [Xanthomonas sp. SHU199]        |
| Le4474 | kanamycin nucleotidyltransferase, partial [Catenibacterium mitsuokai DSM 15897] |
| Le4527 | putative uncharacterized protein [Burkholderia sp. RPE64]                       |
| Le4557 | chemotaxis protein CheW [Pseudomonas fluorescens]                               |
| Le4558 | putative chemotaxis-related methyltransferase [Pseudomonas fluorescens Pf0-1]   |
| Le4559 | chemotaxis protein CheW [Herbaspirillum frisingense]                            |
| Le4572 | lanthionine synthetase C-like protein [Lysobacter sp. ATCC 53042]               |
| Le4573 | hypothetical protein [Lysobacter sp. ATCC 53042]                                |
| Le4588 | beta-lactamase domain-containing protein [Lysobacter sp. ATCC 53042]            |
| Le4595 | putative Mg(2+) transporter [Lysobacter sp. ATCC 53042]                         |
| Le4598 | major facilitator family transporter [Lysobacter sp. ATCC 53042]                |
| Le4604 | cytochrome-c peroxidase [Lysobacter sp. ATCC 53042]                             |
| Le4640 | hydrolase [Burkholderia pyrrocinia]                                             |
| Le4641 | hypothetical protein [Rudaea cellulolytica]                                     |
| Le4644 | hypothetical protein [Xanthomonas sp. SHU199]                                   |
| Le4645 | hypothetical protein [Rhodanobacter fulvus]                                     |
| Le4648 | transcriptional regulator [Fluoribacter dumoffii]                               |
| Le4650 | hypothetical protein [uncultured bacterium, ACD_54C00931G0002]                  |
| Le4651 | hypothetical protein [Xanthomonas sp. SHU199]                                   |
| Le4683 | NA                                                                              |
| Le4696 | NA                                                                              |
| Le4697 | NA                                                                              |
| Le4734 | beta-mannosidase [Stenotrophomonas maltophilia]                                 |
| Le4738 | alpha-1 2-mannosidase [Xanthomonas axonopodis]                                  |
| Le4742 | copper homeostasis protein CutC [Stenotrophomonas maltophilia]                  |
| Le4752 | NA                                                                              |
| Le4755 | NA                                                                              |
| Le4758 | hypothetical protein [Lamprocystis purpurea]                                    |
| Le4759 | glycosyl transferase [Vibrio breoganii]                                         |
| Le4791 | NA                                                                              |
| Le4792 | NA                                                                              |
| Le4796 | NA                                                                              |
| Le4798 | putative exported protein [Xanthomonas translucens]                             |
| Le4800 | hypothetical protein [Achromobacter xylosoxidans]                               |
| Le4801 | hypothetical protein [Acidovorax sp. MR-S7, AVS7_01837]                         |

|        |                                                                         |
|--------|-------------------------------------------------------------------------|
| Le4802 | hypothetical protein [Uliginosibacterium gangwonense]                   |
| Le4803 | NA                                                                      |
| Le4804 | NAD dependent epimerase/dehydratase [Pseudomonas sp. GM80]              |
| Le4805 | putative thiol-disulfide oxidoreductase DCC [Burkholderia gladioli]     |
| Le4816 | NA                                                                      |
| Le4832 | hypothetical protein [Rudaea cellulositytica]                           |
| Le4857 | hypothetical protein [Methylomonas methanica]                           |
| Le4860 | hypothetical protein [Stenotrophomonas maltophilia Ab55555, A1OC_03207] |
| Le4876 | hypothetical protein [Xanthomonas vesicatoria]                          |
| Le4888 | alkane 1-monoxygenase [Xanthomonas sacchari]                            |
| Le4891 | NA                                                                      |
| Le4909 | NA                                                                      |
| Le4911 | NA                                                                      |
| Le4916 | NA                                                                      |
| Le4918 | hypothetical protein [Cellvibrio sp.]                                   |
| Le4933 | hypothetical protein [Halomonas anticariensis]                          |
| Le4945 | hypothetical protein [Xanthomonas sacchari]                             |
| Le4951 | hypothetical protein [Rhodanobacter sp.]                                |
| Le4968 | glyoxalase [Kaistia granuli]                                            |
| Le4977 | hypothetical protein [Variovorax sp.]                                   |
| Le4978 | hypothetical protein [Acetobacter tropicalis]                           |
| Le4980 | carbohydrate-binding CenC domain protein [Conexibacter woesei]          |
| Le4981 | NA                                                                      |
| Le4983 | alpha/beta hydrolase fold protein [Pseudoxanthomonas suwonensis]        |
| Le5000 | protein of unknown function DUF1470 [Granulicella tundricola MP5ACTX9]  |
| Le5013 | NA                                                                      |
| Le5022 | hypothetical protein [Xanthomonas translucens]                          |
| Le5025 | hypothetical protein [Enterococcus moraviensis]                         |
| Le5040 | NA                                                                      |
| Le5047 | putative membrane protein [Xanthomonas translucens]                     |
| Le5053 | hypothetical protein [Xanthomonas sp. SHU199]                           |
| Le5079 | NA                                                                      |
| Le5104 | putative transcriptional regulator, MarR family                         |
| Le5141 | NA                                                                      |
| Le5159 | NA                                                                      |
| Le5160 | NA                                                                      |
| Le5161 | NA                                                                      |
| Le5167 | NA                                                                      |
| Le5172 | NA                                                                      |
| Le5173 | NA                                                                      |
| Le5202 | hypothetical protein, partial [Xanthomonas perforans]                   |
| Le5236 | NA                                                                      |
| Le5260 | NA                                                                      |

1

**Table S2. Distribution of Le4759 and Le0100 in non-*Lysobacter* bacterial genomes**

| Organisms                                       | LuxR           | LuxI           | Le4759         | Le0100         |
|-------------------------------------------------|----------------|----------------|----------------|----------------|
| <i>Luteimonas aquatica</i> RIB1-20              | WP_242108327.1 | none           | WP_242113092.1 | none           |
| <i>Arenimonas composti</i> TR7-09               | none           | none           | WP_026816606.1 | none           |
| <i>Thermomonas alba</i> SYSU G04536             | none           | none           | WP_240125151.1 | none           |
| <i>Halomonas aerodenitrificans</i> MCCC 1A11058 | none           | none           | WP_234255712.1 | none           |
| <i>Tahibacter caeni</i> BUT-6                   | WP_257385461.1 | none           | none           | WP_257386727.1 |
| <i>Pseudomonas fluorescence</i> 2P24            | AAT42219.1     | AAT42217.1     | none           | none           |
| <i>Pectobacterium carotovorum</i> PccS1         | WP_181848026.1 | WP_015842234.1 | none           | none           |
| <i>Pseudomonas arenosa</i> CAU 1598             | WP_225444625.1 | WP_192030098.1 | none           | none           |
| <i>Aquimonas voraii</i> DSM 16957               | WP_176764180.1 | WP_176764181.1 | WP_091242174.1 | none           |
| <i>Nitrospira lacus</i> APG3                    | WP_004180566.1 | WP_004180210.1 | WP_004180885.1 | none           |
| <i>Nitrospira briensis</i> C-128                | WP_025041731.1 | WP_025041701.1 | WP_025040903.1 | none           |
| <i>Candidatus Nitrotoga</i> AM1P                | WP_173052046.1 | WP_242007018.1 | WP_173052373.1 | none           |
| <i>Nitrosovibrio tenuis</i> Nv1                 | WP_090826092.1 | WP_090826837.1 | WP_090827938.1 | none           |
| <i>Nitrospira multiformis</i> N11               | WP_074630300.1 | WP_218124298.1 | WP_074630447.1 | none           |
| <i>Ahniella affigens</i> D13                    | WP_106891580.1 | WP_106891581.1 | WP_170113451.1 | none           |
| <i>Paraburkholderia dipogonis</i> ICMP 19430    | WP_106300542.1 | WP_134460123.1 | WP_134457033.1 | none           |

1

Table S3. Strains and plasmids used in this study

| Strains and plasmids                     | Characteristics <sup>a</sup>                                                                                                                    | Source           |
|------------------------------------------|-------------------------------------------------------------------------------------------------------------------------------------------------|------------------|
| <b>Wild-type strains</b>                 |                                                                                                                                                 |                  |
| <i>Lysobacter enzymogenes</i> OH11       | Wild type, Km <sup>R</sup>                                                                                                                      | (1)              |
| <i>Pseudomonas fluorescence</i> 2P24     | Wild type                                                                                                                                       | (2)              |
| <i>Pectobacterium carotovorum</i> PccS1  | Wild type, Rif <sup>R</sup>                                                                                                                     |                  |
| JZA1                                     | <i>Agrobacterium tumefaciens</i> carrying an AHL reporter plasmid with a traG::lacZ fusion, Sp <sup>R</sup> , Gm <sup>R</sup> , Tc <sup>R</sup> | (3)              |
| <b><i>Escherichia coli</i></b>           |                                                                                                                                                 |                  |
| DH5α                                     | Host strain for molecular cloning                                                                                                               | (4)              |
| XL1-Blue MRF <sup>-</sup> Kan            | Host for bacterial two-hybrid assay                                                                                                             | (4)              |
| BL21(DE3)                                | Host strain for protein expression, Km <sup>R</sup>                                                                                             | (4)              |
| JMP                                      | JM109 with a <i>P<sub>BAD</sub>::pcol</i> fragment insertion on chromosome                                                                      | Laboratory stock |
| <b>In-frame deletion mutants</b>         |                                                                                                                                                 |                  |
| Δ <i>pcol</i>                            | In-frame deletion of <i>pcol</i> in strain 2P24, Km <sup>R</sup>                                                                                | (2)              |
| <b>Overexpression strains</b>            |                                                                                                                                                 |                  |
| 2P24 ( <i>gfp</i> )                      | 2P24 harbouring plasmid pBBR- <i>gfp</i> , Gm <sup>R</sup>                                                                                      | This study       |
| 2P24 ( <i>Le4759</i> )                   | 2P24 harbouring plasmid pBBR- <i>Le4759</i> , Gm <sup>R</sup>                                                                                   | This study       |
| JMP( <i>gfp</i> )                        | JMP harbouring plasmid pBBR- <i>gfp</i> , Gm <sup>R</sup>                                                                                       | This study       |
| JMP( <i>Le4759</i> )                     | JMP harbouring plasmid pBBR- <i>Le4759</i> , Gm <sup>R</sup>                                                                                    | This study       |
| JMP(EV)                                  | JMP harbouring pBBR empty plasmid, Gm <sup>R</sup>                                                                                              | This study       |
| JMP( <i>momL</i> )                       | JMP harbouring plasmid pBBR- <i>momL</i> , Gm <sup>R</sup>                                                                                      | This study       |
| PccS1 ( <i>Le4759</i> )                  | PccS1 harbouring plasmid pBBR- <i>Le4759</i> , Gm <sup>R</sup> , Rif <sup>R</sup>                                                               | This study       |
| PccS1 ( <i>gfp</i> )                     | PccS1 harbouring plasmid pBBR- <i>gfp</i> , Gm <sup>R</sup> , Rif <sup>R</sup>                                                                  | This study       |
| PccS1 ( <i>Le4759<sup>R70L</sup></i> )   | PccS1 harbouring plasmid pBBR- <i>Le4759<sup>R70L</sup></i> , Gm <sup>R</sup> , Rif <sup>R</sup>                                                | This study       |
| PccS1 ( <i>Le4759<sup>R84H</sup></i> )   | PccS1 harbouring plasmid pBBR- <i>Le4759<sup>R84H</sup></i> , Gm <sup>R</sup> , Rif <sup>R</sup>                                                | This study       |
| PccS1 ( <i>Le4759<sup>I-200</sup></i> )  | PccS1 harbouring plasmid pBBR- <i>Le4759<sup>I-200</sup></i> , Gm <sup>R</sup> , Rif <sup>R</sup>                                               | This study       |
| PccS1 ( <i>Le4759<sup>I2-383</sup></i> ) | PccS1 harbouring plasmid pBBR- <i>Le4759<sup>I2-383</sup></i> , Gm <sup>R</sup> , Rif <sup>R</sup>                                              | This study       |
| Δ <i>pcol</i> ( <i>gfp</i> )             | Δ <i>pcol</i> harbouring plasmid pBBR- <i>gfp</i> , Gm <sup>R</sup>                                                                             | This study       |
| Δ <i>pcol</i> ( <i>Le4759</i> )          | Δ <i>pcol</i> harbouring plasmid pBBR- <i>Le4759</i> , Gm <sup>R</sup>                                                                          | This study       |
| Δ <i>pcol</i> ( <i>momL</i> )            | Δ <i>pcol</i> harbouring plasmid pBBR- <i>momL</i> , Gm <sup>R</sup>                                                                            | This study       |
| DH5α ( <i>carl</i> & <i>Le4759</i> )     | DH5α harbouring plasmid pBBR- <i>Le4759</i> and pUCP26- <i>carl</i> Tc <sup>R</sup> , Gm <sup>R</sup>                                           | This study       |
| DH5α ( <i>carl</i> & <i>gfp</i> )        | DH5α harbouring plasmid pBBR- <i>gfp</i> and pUCP26- <i>carl</i> Tc <sup>R</sup> , Gm <sup>R</sup>                                              | This study       |
| DH5α ( <i>carl</i> & EV)                 | DH5α harbouring pBBR empty plasmid and pUCP26- <i>carl</i> Tc <sup>R</sup> , Gm <sup>R</sup>                                                    | This study       |
| DH5α ( <i>lbsI</i> & <i>Le4759</i> )     | DH5α harbouring plasmid pBBR- <i>Le4759</i> and pUCP26- <i>lbsI</i> Tc <sup>R</sup> , Gm <sup>R</sup>                                           | This study       |
| DH5α ( <i>lbsI</i> & <i>gfp</i> )        | DH5α harbouring plasmid pBBR- <i>gfp</i> and pUCP26- <i>lbsI</i> Tc <sup>R</sup> , Gm <sup>R</sup>                                              | This study       |
| DH5α ( <i>lbsI</i> & EV)                 | DH5α harbouring pBBR empty plasmid and pUCP26- <i>lbsI</i> Tc <sup>R</sup> , Gm <sup>R</sup>                                                    | This study       |
| <b>Plasmids</b>                          |                                                                                                                                                 |                  |
| pBBR-MCS5                                | Broad-host-vector with a P <sub>lac</sub> promoter, Gm <sup>R</sup>                                                                             | (5)              |
| pTRG                                     | The plasmid used for protein expression in bacterial two-hybridization assay, Tc <sup>R</sup>                                                   | (6)              |
| pBT                                      | The plasmid used for protein expression in bacterial two-hybridization assay, Chlo <sup>R</sup>                                                 | (6)              |
| pBT- <i>Le4759</i>                       | pBT with the coding region of <i>Le4759</i> from strain OH11, Chl <sup>R</sup>                                                                  | This study       |
| pBT- <i>gacS</i>                         | pBT containing the coding region of <i>gacS</i>                                                                                                 | (4)              |
| pTRG- <i>pcol</i>                        | pTRG with the coding region of <i>pcol</i> , Tc <sup>R</sup>                                                                                    | This study       |
| pTRG- <i>lbsI</i>                        | pTRG with the coding region of <i>lbsI</i> , Tc <sup>R</sup>                                                                                    | This study       |
| pTRG- <i>carl</i>                        | pTRG containing the coding region of <i>carl</i> , Tc <sup>R</sup>                                                                              | This study       |
| pTRG- <i>gacS</i>                        | pTRG containing the coding region of <i>gacS</i> , Tc <sup>R</sup>                                                                              | This study       |
| pBBR- <i>gfp</i>                         | pBBR-MCS5 with the coding region of <i>gfp</i> , Gm <sup>R</sup>                                                                                | This study       |
| pBBR- <i>pcol</i>                        | pBBR-MCS5 with the coding region of <i>pcol</i> , Gm <sup>R</sup>                                                                               | This study       |
| pBBR- <i>Le4759</i>                      | pBBR-MCS5 with the coding region of <i>Le4759</i> , Gm <sup>R</sup>                                                                             | This study       |
| pBBR- <i>Le4759<sup>R70L</sup></i>       | pBBR-MCS5 with the coding region of <i>Le4759<sup>R70L</sup></i> , Gm <sup>R</sup>                                                              | This study       |
| pBBR- <i>Le4759<sup>R84H</sup></i>       | pBBR-MCS5 with the coding region of <i>Le4759<sup>R84H</sup></i> , Gm <sup>R</sup>                                                              | This study       |
| pBBR- <i>Le4759<sup>I-200</sup></i>      | pBBR-MCS5 with the coding region of <i>Le4759<sup>I-200</sup></i> , Gm <sup>R</sup>                                                             | This study       |
| pBBR- <i>Le4759<sup>I2-383</sup></i>     | pBBR-MCS5 with the coding region of <i>Le4759<sup>I2-383</sup></i> , Gm <sup>R</sup>                                                            | This study       |
| pBBR- <i>momL</i>                        | pBBR-MCS5 with the coding region of <i>momL</i> , Gm <sup>R</sup>                                                                               | This study       |
| pUCP26- <i>pcol</i>                      | pUCP26 with the coding region of <i>pcol</i> , Gm <sup>R</sup>                                                                                  | This study       |
| pUCP26- <i>carl</i>                      | pUCP26 with the coding region of <i>carl</i> , Gm <sup>R</sup>                                                                                  | This study       |
| pUCP26- <i>lbsI</i>                      | pUCP26 with the coding region of <i>lbsI</i> , Gm <sup>R</sup>                                                                                  | This study       |

2 <sup>a</sup>Km<sup>R</sup>, Gm<sup>R</sup> Amp<sup>R</sup>, Tc<sup>R</sup>, Chlo<sup>R</sup>, Sp<sup>R</sup>, kanamycin, gentamicin, ampicillin, tetracycline, chloramphenicol, spectinomycin resistance,  
3 respectively.

4

5

Table S4. Primers used in this study

| Primer                                         | Sequence (5'-3') <sup>a</sup>                                                              | Purpose                                                                                        |
|------------------------------------------------|--------------------------------------------------------------------------------------------|------------------------------------------------------------------------------------------------|
| <b>Overexpression</b>                          |                                                                                            |                                                                                                |
| <i>Le4759</i> -F                               | AGGGAACAAAAGCTGGGTACCgATGCGCATCTTGTTCCTGACCG ( <i>KpnI</i> )                               | To amplify a 1257-bp fragment of <i>Le4759</i> fused with a FLAG tag                           |
| <i>Le4759</i> -FLAG-R                          | CGCGGTGGCGGCCGCTCTAGATTACTTATCGTCGTCATCCTTGTAAATCCTCCGGCGTGCACAACAGGC ( <i>XbaII</i> )     |                                                                                                |
| <i>momL</i> -F                                 | CCCAAGCTTgAtgaatatgaaaaagctactgttac ( <i>HindIII</i> )                                     | To amplify a 1377-bp fragment of <i>momL</i>                                                   |
| <i>momL</i> -R                                 | TGCTCTAGAttattgtaaagtgggtgcctgg( <i>XbaII</i> )                                            |                                                                                                |
| <i>Le4759</i> <sup>212-383</sup> -F            | CGCGGTGGCGGCCGCTCTAGATTACTTATCGTCGTCATCCTTGTAAATCGCCGTGAGCACGACGTGGATCTT( <i>KpnI</i> )    | To amplify a 516-bp downstream homologue of <i>Le4759</i> <sup>212-383</sup>                   |
| <i>Le4759</i> <sup>1-200</sup> -FLAG-R         | CGCGGTGGCGGCCGCTCTAGATCACTTATCGTCGTCATCCTTGTAAATCCACGCTGGCGGCAGCACGGCGAAG ( <i>XbaII</i> ) | To amplify a 600-bp upstream homologue of <i>Le4759</i> <sup>1-200</sup> fused with a FLAG tag |
| <i>Le4759</i> <sup>R70L</sup> -F               | TCCGGGTGGTGCtGGTCAAGACC                                                                    | To amplify a 1061-bp downstream homologue of <i>Le4759</i> <sup>R70L</sup>                     |
| <i>Le4759</i> <sup>R70L</sup> -R               | GGTCTTGACCAGCACCACCCGGA                                                                    | To amplify a 219-bp upstream homologue of <i>Le4759</i> <sup>R70L</sup>                        |
| <i>Le4759</i> <sup>R84H</sup> -F               | GCTTCCTCAAGCaCACCTGGAC                                                                     | To amplify a 1019-bp downstream homologue of <i>Le4759</i> <sup>R84H</sup>                     |
| <i>Le4759</i> <sup>R84H</sup> -R               | GTCCAGGGTGTGCTTGAGGAAGC                                                                    | To amplify a 216-bp upstream homologue of <i>Le4759</i> <sup>R84H</sup>                        |
| <i>gfp</i> -FLAG-F                             | CCCAAGCTTgATGAGTAAAGGTGAAGAAGTGT ( <i>HindIII</i> )                                        | To amplify a 717-bp fragment upstream of <i>gfp</i> fused with a FLAG tag                      |
| <i>gfp</i> -FLAG-R                             | TGCTCTAGATCACTTATCGTCGTCATCCTTGTAAATCTTTGTAGAGTTCATCCATG ( <i>XbaI</i> )                   |                                                                                                |
| <b>Protein expression and Pull-down assays</b> |                                                                                            |                                                                                                |
| pET30a- <i>pcol</i> -F                         | GGAATCCATATGAAATACTTAATAGACAAAACGCGAG( <i>NdeI</i> )                                       | To amplify a 576-bp fragment of <i>pcol</i>                                                    |
| pET30a- <i>pcol</i> -R                         | CCCAAGCTTACCACCGTTGACGGCGTCCAACG ( <i>HindIII</i> )                                        |                                                                                                |
| pET30a- <i>carI</i> -F                         | ACTTAAAGAAGGAGATATACATATGATGTTAGAGATATTTGATG( <i>NdeI</i> )                                | To amplify a 651-bp fragment of <i>carI</i>                                                    |
| pET30a- <i>carI</i> -R                         | GGTGCTCGAGTGCGGCCGCAAGCTTAGCCTGTACAATAGCGGCAG ( <i>HindIII</i> )                           |                                                                                                |
| pET30a- <i>lbsI</i> -F                         | ACTTAAAGAAGGAGATATACATATGATGACCCGATTGCCATCGGC( <i>NdeI</i> )                               | To amplify a 618-bp fragment of <i>lbsI</i>                                                    |
| pET30a- <i>lbsI</i> -R                         | GGTGCTCGAGTGCGGCCGCAAGCTTGGCTGCGCGGGCGATGTCGAGT ( <i>HindIII</i> )                         |                                                                                                |
| pET30a- <i>Le4759</i> -F                       | ACTTAAAGAAGGAGATATACATATGATGCGCATCTTGTTCCTGACCG( <i>NdeI</i> )                             | To amplify a 1257-bp fragment of <i>Le4759</i>                                                 |
| pET30a- <i>Le4759</i> -R                       | GGTGCTCGAGTGCGGCCGCAAGCTTCTCCGGCGTGCACAACAGGC ( <i>HindIII</i> )                           |                                                                                                |
| <b>Co-IP assays</b>                            |                                                                                            |                                                                                                |
| <i>Le4759</i> -F                               | AGGGAACAAAAGCTGGGTACCgATGCGCATCTTGTTCCTGACCG ( <i>KpnI</i> )                               | To amplify a 1257-bp fragment of <i>Le4759</i> fused with a FLAG tag                           |
| <i>Le4759</i> -FLAG-R                          | CGCGGTGGCGGCCGCTCTAGATTACTTATCGTCGTCATCCTTGTAAATCCTCCGGCGTGCACAACAGGC ( <i>XbaII</i> )     |                                                                                                |
| <i>pcol</i> -His-F                             | CTATGACCATGATTACGAATTCgATGAAATACTTAATAGACAAAACGCG ( <i>EcoRI</i> )                         | To amplify a 576-bp fragment of <i>pcol</i> fused with a His tag                               |
| <i>pcol</i> -His-R                             | GCAGGTCGACTCTAGAGGATCCTTAATGATGATGATGATGGTGACCACCGTTGACGGCGTCCAACG ( <i>BamHI</i> )        |                                                                                                |
| <i>carI</i> -His-F                             | CTATGACCATGATTACGAATTCgATGTTAGAGATATTTGATG                                                 | To amplify a 651-bp fragment of <i>CarI</i> fused with a His tag                               |
| <i>carI</i> -His-R                             | GCAGGTCGACTCTAGAGGATCCTTAATGATGATGATGATGGTGAGCCTGTACAATAGCGGCAG                            |                                                                                                |
| <i>lbsI</i> -His-F                             | CTATGACCATGATTACGAATTCgATGACCCGATTGCCATCGGC                                                | To amplify a 618-bp fragment of <i>LbsI</i> fused with a His tag                               |
| <i>lbsI</i> -His-R                             | CAGGTCGACTCTAGAGGATCCTCAATGATGATGATGATGGTGGGCTGCGCGGGCGATGTCGAGT                           |                                                                                                |
| <i>gfp</i> -FLAG-F                             | CCCAAGCTTgATGAGTAAAGGTGAAGAAGTGT ( <i>HindIII</i> )                                        | To amplify a 717-bp fragment of <i>gfp</i> fused with a FLAG tag                               |
| <i>gfp</i> -FLAG-R                             | TGCTCTAGATCACTTATCGTCGTCATCCTTGTAAATCTTTGTAGAGTTCATCCATG ( <i>XbaI</i> )                   |                                                                                                |
| <b>Bacterial two-hybrid assays</b>             |                                                                                            |                                                                                                |
| pBT- <i>Le4759</i> -F                          | TGGCGCGGCCGATCGAATTCATGCGCATCTTGTTCCTGAC ( <i>EcoRI</i> )                                  | To amplify a 1257-bp fragment of <i>Le4759</i> and cloned into pBT                             |
| pBT- <i>Le4759</i> -R                          | AATTAATTAACCTCGAGGATCCTTACTCCGGCGTGCACAACAGG ( <i>BamHI</i> )                              |                                                                                                |

|                      |                                                                     |                                                                  |
|----------------------|---------------------------------------------------------------------|------------------------------------------------------------------|
| pTRG- <i>pcol</i> -F | AAACCAGAGGCGGCC <u>GGATCC</u> GATGAAATACTTAATA ( <i>Bam</i> HI)     | To amplify a 576-bp fragment of <i>pcol</i> and cloned into pTRG |
| pTRG- <i>pcol</i> -R | GCGCCAGCTCAGACTGAATTCCTTAACCACCGTTGACGGC ( <i>Eco</i> RI)           |                                                                  |
| pTRG- <i>carI</i> -F | AAACCAGAGGCGGCC <u>GGATCC</u> ATGTTAGAGATATTGATG ( <i>Bam</i> HI)   | To amplify a 651-bp fragment of <i>carI</i> and cloned into pTRG |
| pTRG- <i>carI</i> -R | GCGCCAGCTCAGACTGAATTCCTAAGCCTGTACAATAGCGG ( <i>Eco</i> RI)          |                                                                  |
| pTRG- <i>lbsI</i> -F | AAACCAGAGGCGGCC <u>GGATCC</u> ATGACCCGTATTGCCATCGG ( <i>Bam</i> HI) | To amplify a 618-bp fragment of <i>lbsI</i> and cloned into pTRG |
| pTRG- <i>lbsI</i> -R | GCGCCAGCTCAGACTGAATTCCTCAGGCTGCGCGGGCGATGTC ( <i>Eco</i> RI)        |                                                                  |

1 <sup>a</sup>Restricted digestion enzyme site was underlined.

1  
2  
3  
4  
5  
6  
7  
8  
9  
10  
11  
12  
13  
14  
15  
16  
17  
18  
19  
20  
21  
22  
23  
24  
25  
26  
27  
28

|                                  |                                |                                 |                                |                              |
|----------------------------------|--------------------------------|---------------------------------|--------------------------------|------------------------------|
| I: <i>E. coli</i> ( <i>gfp</i> ) | II: <i>E. coli</i> (Le1421)    | III: <i>E. coli</i> (Le1394)    | IV: <i>E. coli</i> (Le1388)    | V: <i>E. coli</i> (Le2830)   |
| VI: <i>E. coli</i> (Le0190)      | VII: <i>E. coli</i> (Le1391)   | VIII: <i>E. coli</i> (Le1100)   | IX: <i>E. coli</i> (Le0969)    | X: <i>E. coli</i> (Le2156)   |
| XI: <i>E. coli</i> (Le0926)      | XII: <i>E. coli</i> (Le0915)   | XIII: <i>E. coli</i> (Le2703)   | XIV: <i>E. coli</i> (Le3019)   | XV: <i>E. coli</i> (Le1097)  |
| XVI: <i>E. coli</i> (Le1792)     | XVII: <i>E. coli</i> (Le0982)  | XVIII: <i>E. coli</i> (Le1383)  | XIX: <i>E. coli</i> (Le3466)   | XX: <i>E. coli</i> (Le1680)  |
| XXI: <i>E. coli</i> (Le0840)     | XXII: <i>E. coli</i> (Le1035)  | XXIII: <i>E. coli</i> (Le0040)  | XXVI: <i>E. coli</i> (Le4968)  | XXV: <i>E. coli</i> (Le4805) |
| XXVI: <i>E. coli</i> (Le4306)    | XXVII: <i>E. coli</i> (Le4074) | XXVIII: <i>E. coli</i> (Le3917) | XXIX: <i>E. coli</i> (Le4588)  | XXX: <i>E. coli</i> (Le4888) |
| XXXI: <i>E. coli</i> (Le4798)    | XXXII: <i>E. coli</i> (Le4983) | XXXIII: <i>E. coli</i> (Le0022) | XXXIV: <i>E. coli</i> (Le0311) |                              |

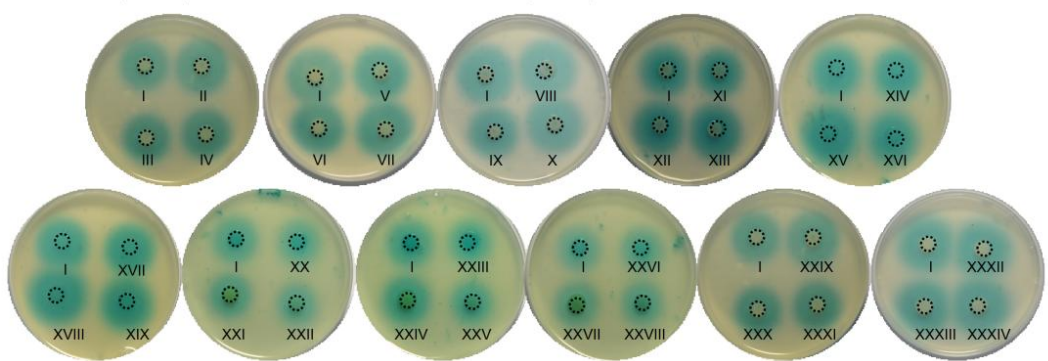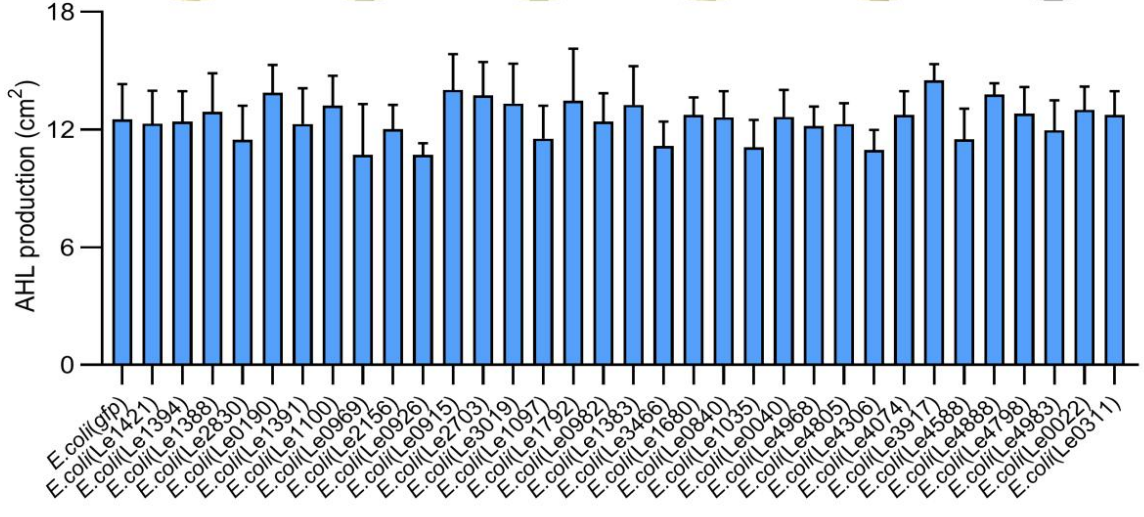

29 **Figure S1. The *Lysobacter* genes was screened to identify targets that block AHL**  
 30 **production in *E. coli* JM109 expressing the active AHL synthase gene *pcoI*. The**  
 31 34 selected *Lysobacter* genes were those only conservatively shared by  
 32 non-AHL-producing *Lysobacter* but absent in AHL-producing species. Its details are  
 33 shown in the Table S1 with red highlight. PcoI is an AHL synthase from  
 34 *Pseudomonas fluorescence* 2P24.



1  
2  
3  
4  
5  
6  
7  
8  
9  
10  
11  
12  
13  
14  
15  
16

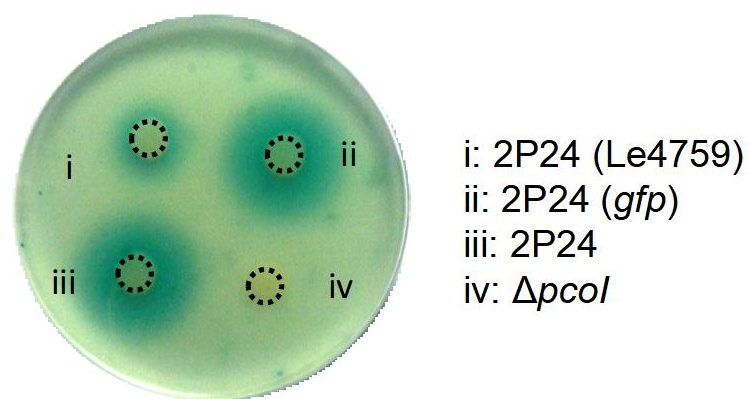

**Figure S2. Representative images showing the production of AHL in *Pseudomonas fluorescence* 2P24 expressing Le4759. AHL production was determined by the AHL biosensor JZA1, and the AHL quantification data were shown in Figure 1F.**

1  
2  
3  
4  
5  
6  
7  
8  
9  
10  
11  
12  
13  
14  
15  
16  
17  
18  
19

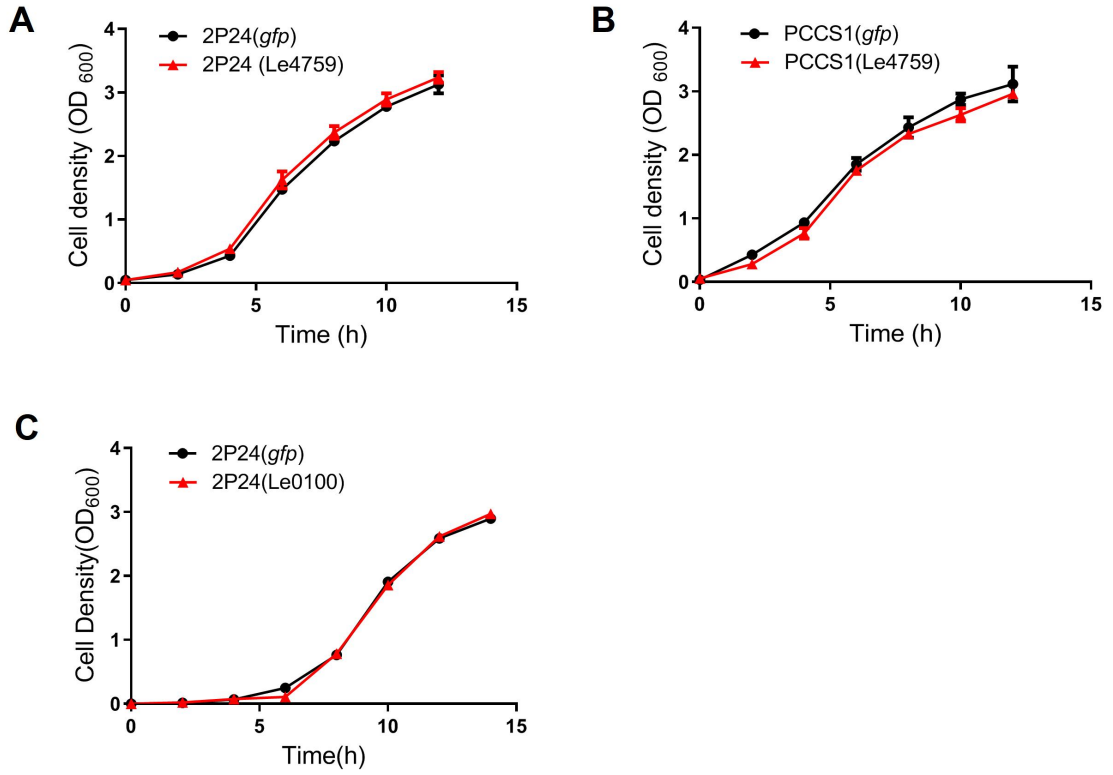

**Figure S3. Heterogeneous expression of *Le4759* and *Le0100* in *Pseudomonas fluorescence* 2P24 did not alter the normal growth ability of the bacteria.**

1  
2  
3  
4  
5  
6  
7  
8  
9  
10  
11  
12  
13  
14  
15  
16  
17  
18  
19  
20  
21  
22  
23

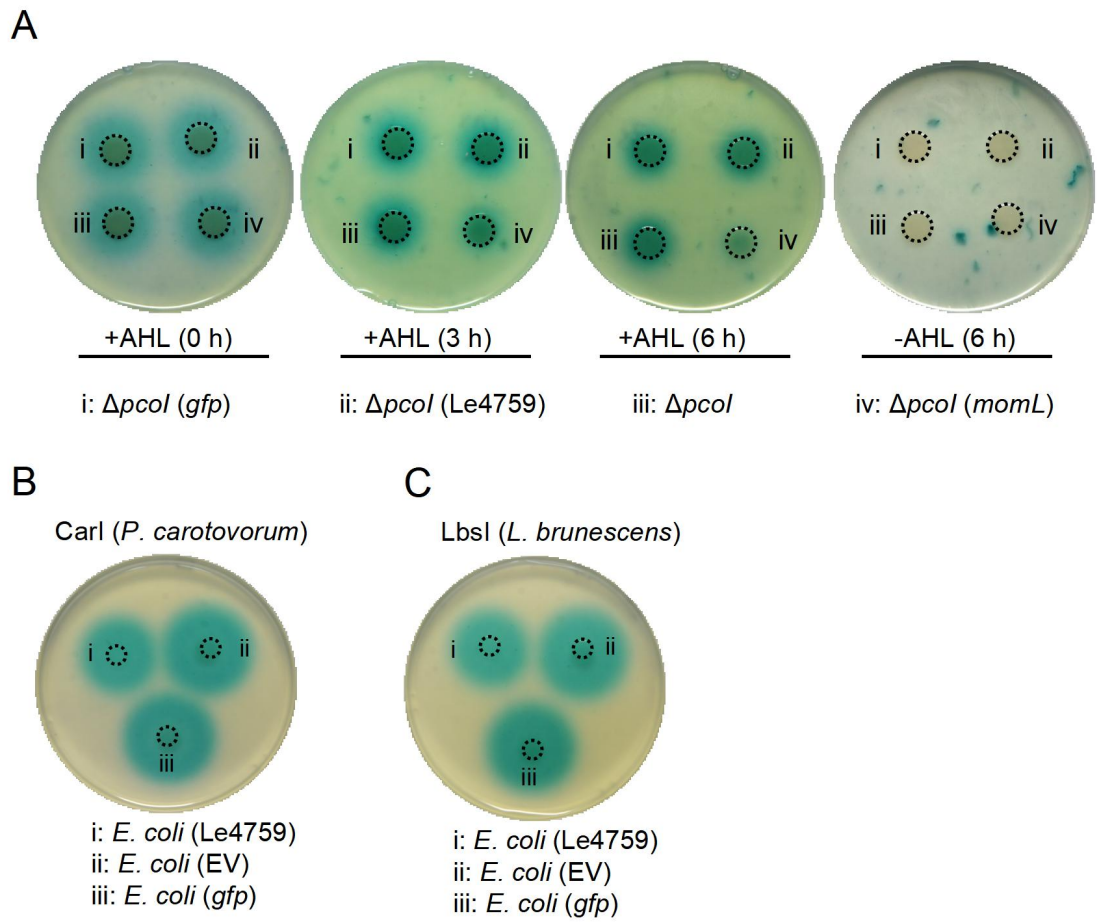

**Figure S4. Representative images of AHL production as determined by the AHL biosensor JZA1. (A)** Le4759 failed to degrade the commercial AHL standard (3-oxo-C10-HSL). **(B-C)** Le4759 blocked the CarI- or LbsI-dependent AHL production in *E. coli*. AHL quantification data in panels A, B and C were shown in Figure 2A, 2F and 2G, respectively.

1  
2  
3  
4  
5  
6  
7  
8  
9  
10  
11

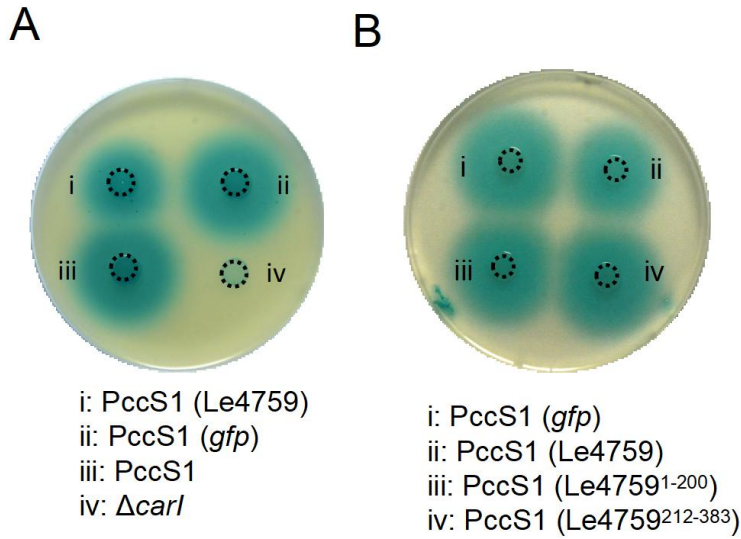

12 **Figure S5. Representative images showing AHL production in *Pectobacterium***  
13 ***carotovorum* PccS1 expressing Le4759 and its two truncated variants. AHL**  
14 **production was determined by the AHL biosensor JZA1. AHL quantification data in**  
15 **panels A and B were shown in Figure 3A and 3G, respectively.**

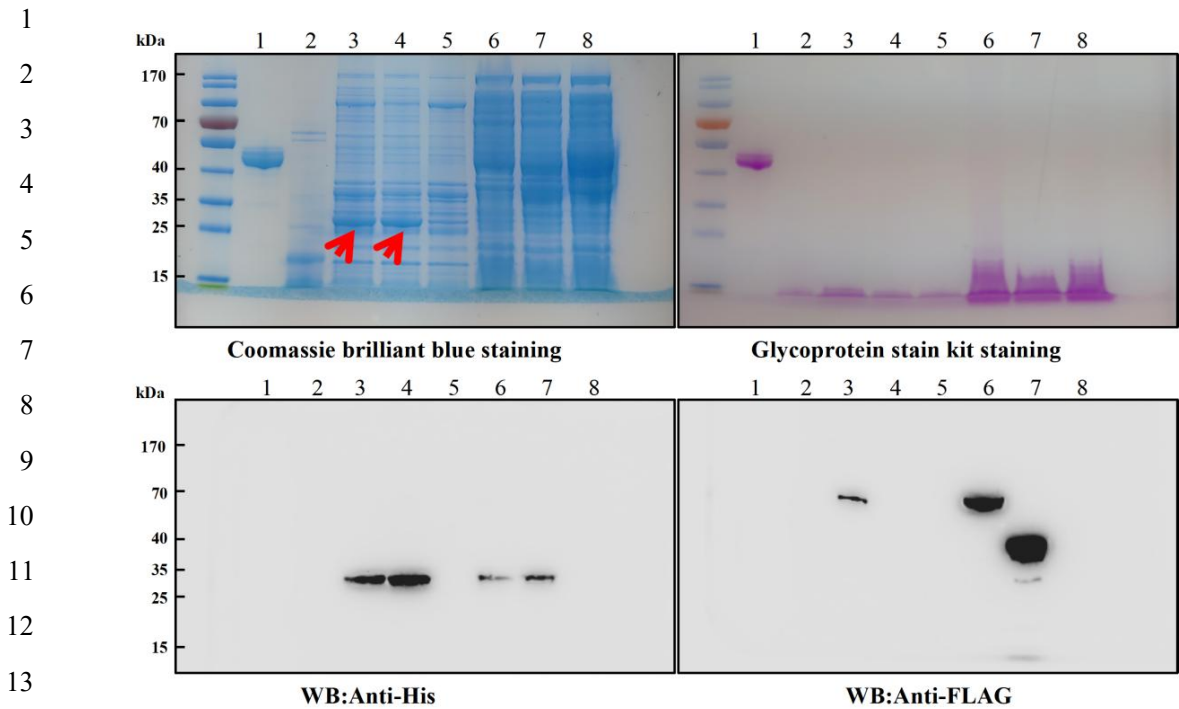

15 **Figure S6. Co-expression of the *Le4759* and *pcoI* gene in *E. coli* did not detect the**  
 16 **glycosyltransferase activity of *Le4759*.** We co-transformed the pUCP-PcoI-His and  
 17 pBBR-*Le4759*-FLAG or pBBR-GFP-FLAG (negative control) in *E. coli* DH5 $\alpha$ , and  
 18 drove the expression of *pcoI* and *Le4759* by a constitutive promoter from the  
 19 corresponding plasmid. The corresponding strains were collected and broken by  
 20 ultrasound, and the supernatant was incubated with anti-His magnetic beads to  
 21 successfully enriched the PcoI-His protein under the condition of expressing *Le4759*  
 22 and GFP. Glycoprotein staining assay revealed that *Le4759* did not appear to be an  
 23 active glycosyltransferase for glycosylated PcoI in *E. coli*. Line1: Positive control,  
 24 containing 16% glycoprotein; Line2: Negative control, no glycoprotein; Line3-5 :  
 25 PcoI+*Le4759*, PcoI+GFP, *E. coli* DH5 $\alpha$  supernatant enriched with anti-His magnetic  
 26 beads, respectively; Line6-8 : PcoI+*Le4759*, PcoI+GFP, *E. coli* DH5 $\alpha$  cell  
 27 fragmentation supernatant, respectively. The red arrow indicates the position of the  
 28 PcoI.

1  
2  
3  
4  
5  
6  
7  
8  
9  
10  
11  
12  
13

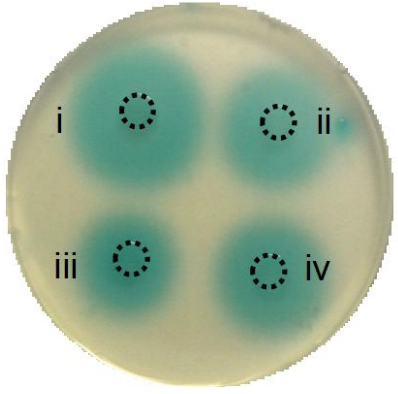

i: PccS1 (*gfp*)  
ii: PccS1 (Le4759)  
iii: PccS1 (La1165)  
iv: PccS1 (GLE2246)

**Figure S7. Representative images showing the production of AHL in *Pectobacterium carotovorum* PccS1 expressing Le4759 and its two homologous genes (La1165 and GLE2246). AHL production was determined by the AHL biosensor JZA1, and AHL quantification data were shown in Figure 3H.**

1  
2  
3  
4  
5  
6  
7  
8  
9  
10  
11  
12  
13  
14  
15  
16  
17

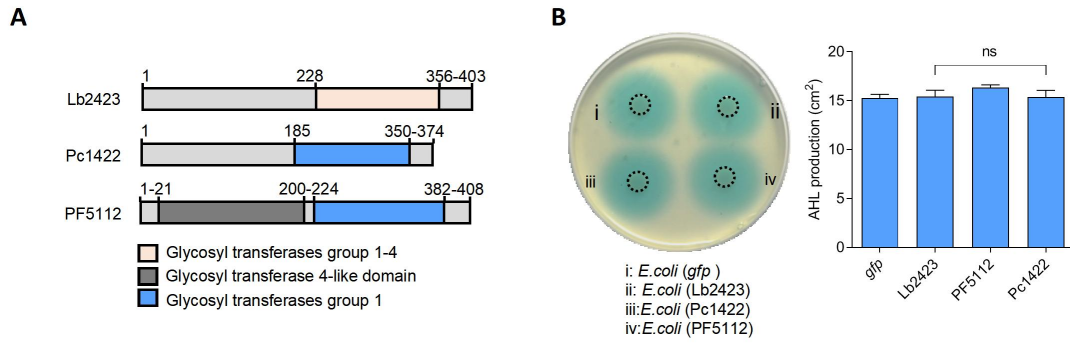

**Figure S8. Detection of AHL-quenching activity of three Le4759-unrelated, glycosyltransferase-domain containing genes.** (A) Prediction domains of three Le4759-unrelated, glycosyltransferase-domain containing genes (*Lb2423*, *Pc1422* and *PF5112*) of *Lysobacter brunescens* OH21, *Pectobacterium carotovorum* PccS1 and *Pseudomonas fluorescens* 2P24. (B) Ectopic expression of the *Lb2423*, *Pc1422* and *PF5112* gene in recombinant, *pcoI*-expressing *E. coli* had no detectable AHL-quenching activity. Recombinant *E. coli* was induced to produce AHL by adding 0.1% arabinose. NCBI reference sequence accession numbers: WP\_194431416.1 (*Pc1422*), WP\_134925924.1 (*PF5112*).

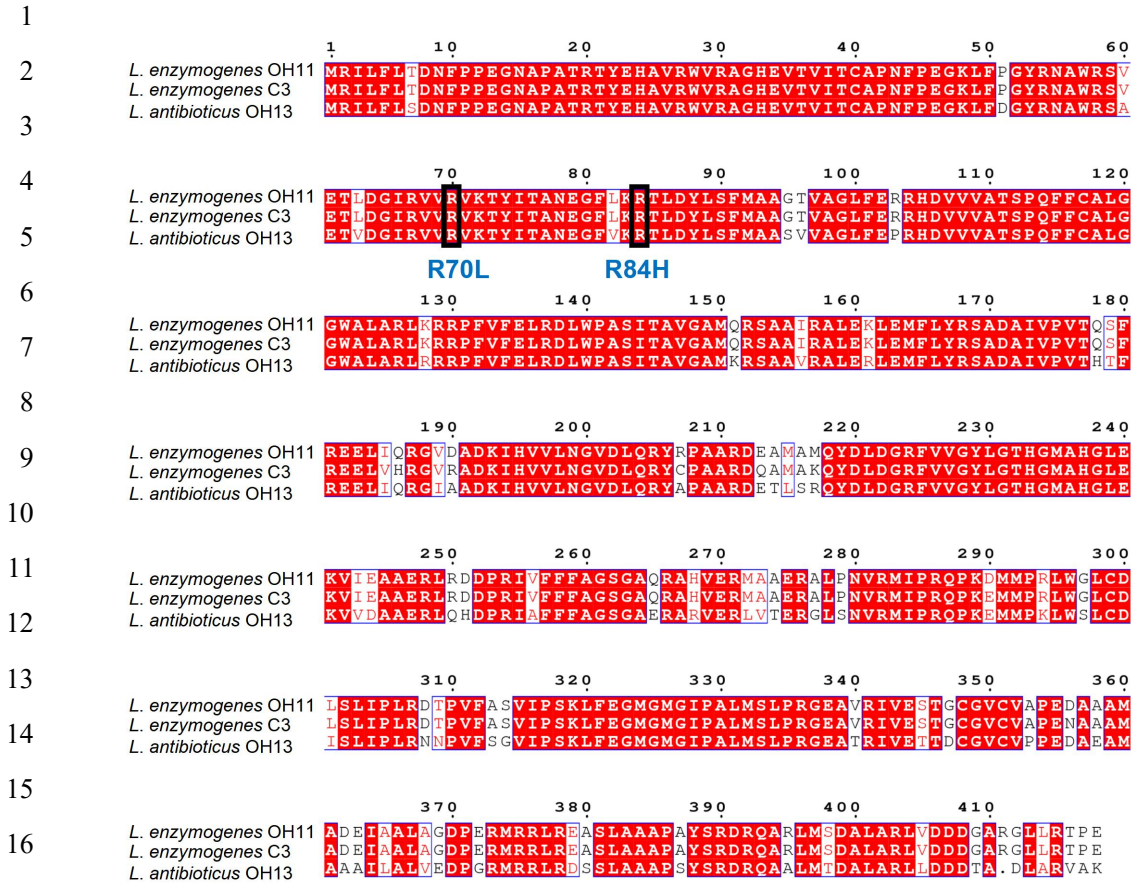

18 **Figure S9. Sequence alignment of Le4759 and its two homologues (GLE2246 and**

19 **La1165).** Boxes indicates the positions of conserved amino residues R70 and R84.

20 GLE2246 and La1165 are homologues of Le4759 from the non-AHL-producing *L.*

21 *enzymogenes* C3 and *L. antibioticus* OH13, respectively.



1  
2  
3  
4  
5  
6  
7  
8  
9  
10  
11  
12  
13

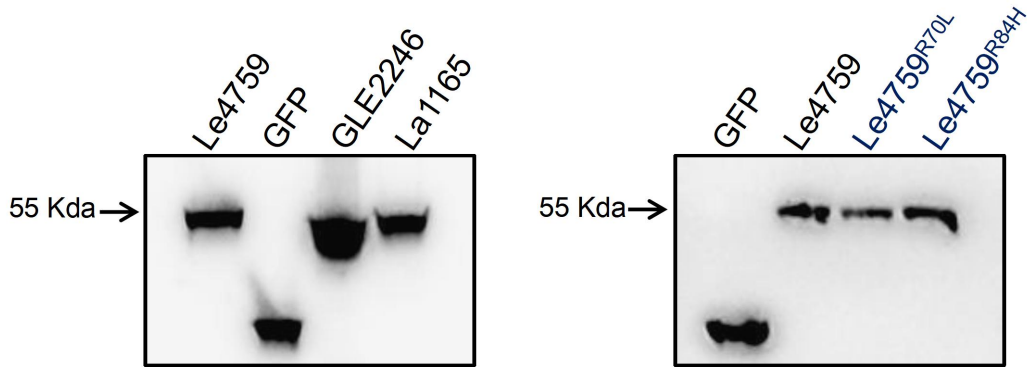

**Figure S10. Western blotting analysis of protein expression in *Pectobacterium carotovorum* PccS1.** The left panel represents the heterogeneous expression of Le4759 and its two homologous genes (*GLE2246* and *La1165*) in *P. carotovorum* PccS1. The right panel represents the expression of two Le4759 point mutant variants (Le4759<sup>R70L</sup> and Le4759<sup>R84H</sup>) in *P. carotovorum* PccS1.

1  
2  
3  
4  
5  
6  
7

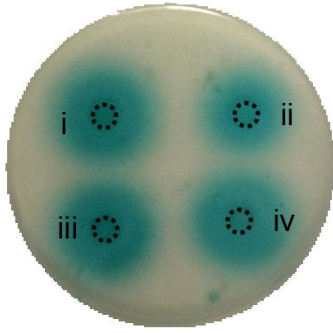

i: PccS1 (*gfp*)  
ii: PccS1 (Le4759)  
iii: PccS1 (Le4759<sup>R70L</sup>)  
iv: PccS1 (Le4759<sup>R84H</sup>)

8 **Figure S11. Representative images showing the production of AHL in**  
9 ***Pectobacterium carotovorum* PccS1 expressing Le4759 and its two point mutant**  
10 **variants.** AHL production was determined by the AHL biosensor JZA1, and the AHL  
11 quantification data were shown in Figure 3I.

1 I: *E. coli* (*momL*) II: *E. coli* (*gfp*) III: *E. coli* (Le0022) IV: *E. coli* (Le0661) V: *E. coli* (Le0797) VI: *E. coli* (Le1210)  
 2 VII: *E. coli* (Le0915) VIII: *E. coli* (Le2703) IX: *E. coli* (Le2716) X: *E. coli* (Le2717) XI: *E. coli* (Le2718)  
 3 XII: *E. coli* (Le2790) XIII: *E. coli* (Le3595) XIV: *E. coli* (Le4640) XV: *E. coli* (Le0100) XVI: *E. coli* (Le4983)

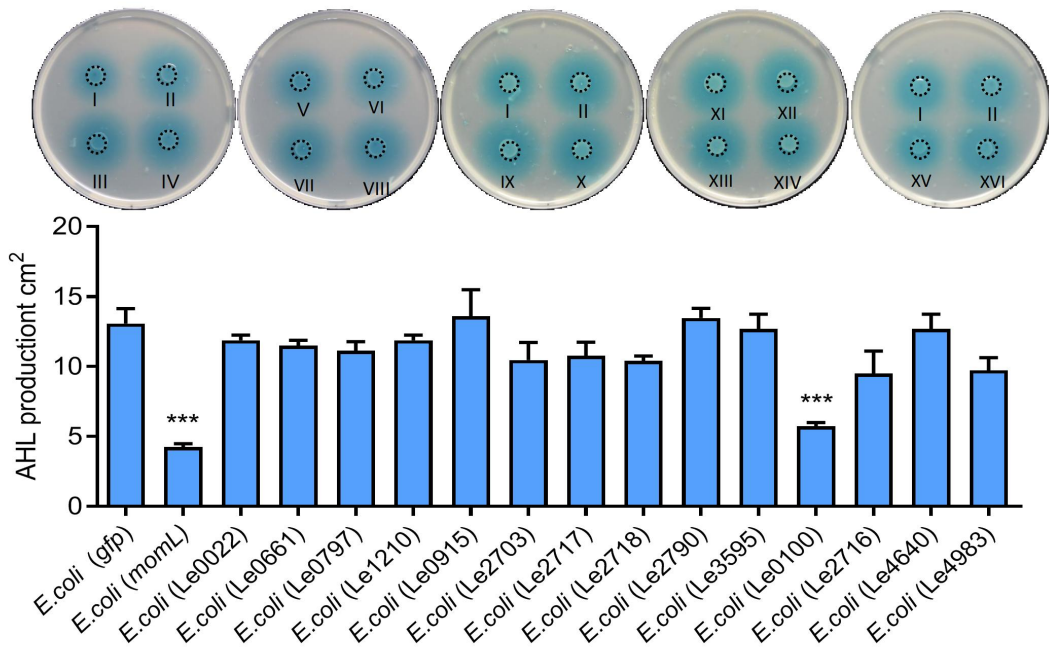

16 **Figure S12. Additional 14 *Lysobacter* genes were screened to identify targets that**  
 17 **could prevent AHL production in *E. coli* JM109 expressing the active AHL**  
 18 **synthase gene *PcoI*.** The 14 *Lysobacter* genes selected were those that were  
 19 conservatively shared only by non-AHL-producing *Lysobacter* but not present in  
 20 AHL-producing species. Its details were shown in a supplemental excel table with  
 21 blue highlight. *PcoI* is an AHL synthase from *Pseudomonas fluorescence* 2P24.

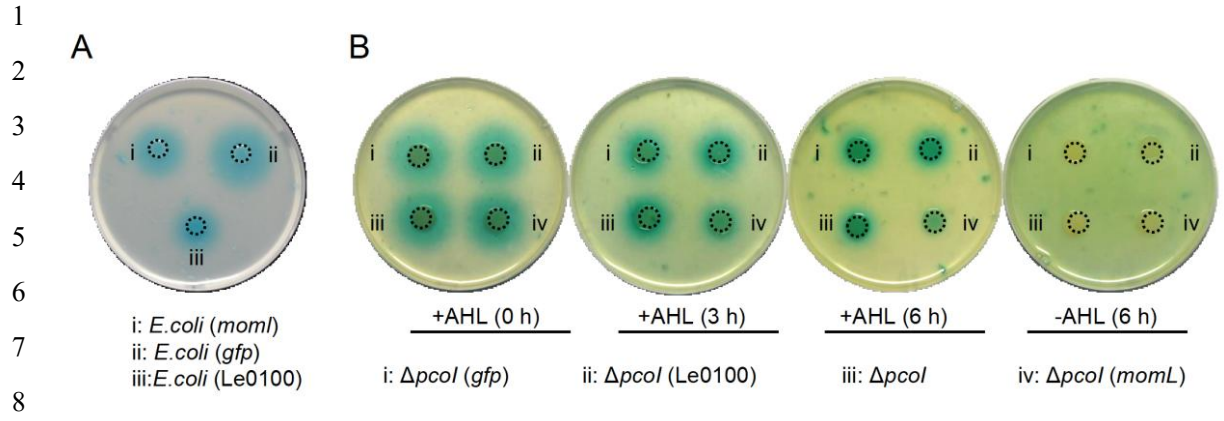

9 **Figure S13. Representative images of AHL production as determined by the AHL**  
10 **biosensor JZA1. (A)** Le0100 blocked the PcoI-dependent AHL production in *E. coli*.  
11 **(B)** Le0100 failed to degrade the commercial AHL standard (3-oxo-C10-HSL). AHL  
12 quantification data in panels A and B were shown in Figure 4A and 4B, respectively.

1  
2  
3  
4  
5  
6  
7  
8  
9  
10  
11  
12  
13

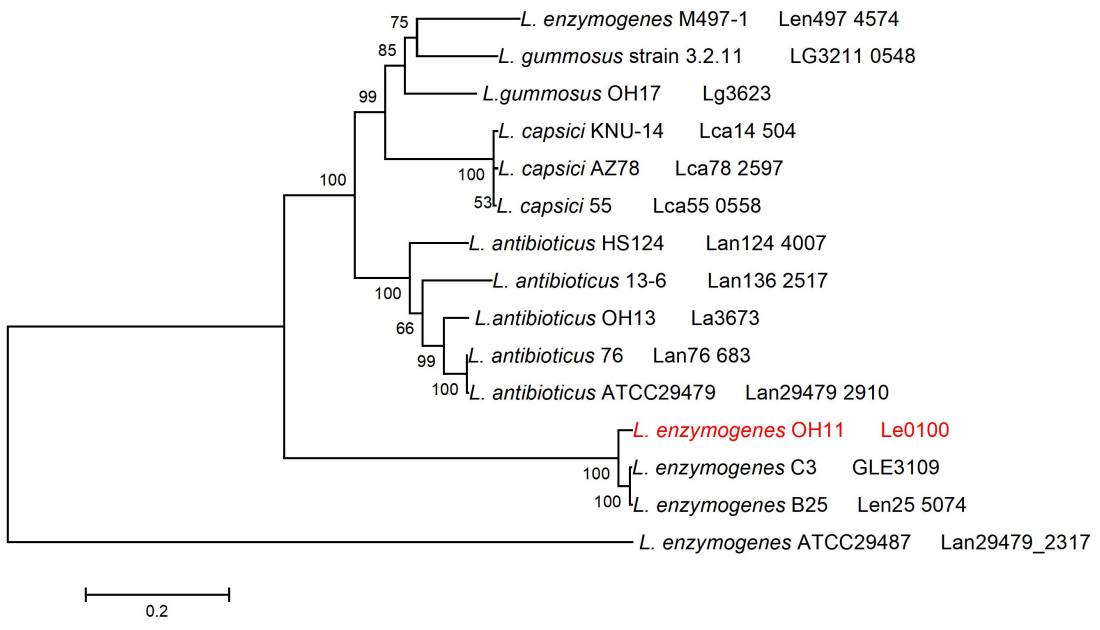

14 **Figure S14. Phylogenetic tree of Le0100 and its homologues from 15 selected**  
15 **non-AHL-producing *Lysobacter* species.**

1  
2  
3  
4  
5  
6  
7  
8  
9  
10  
11  
12  
13  
14  
15  
16

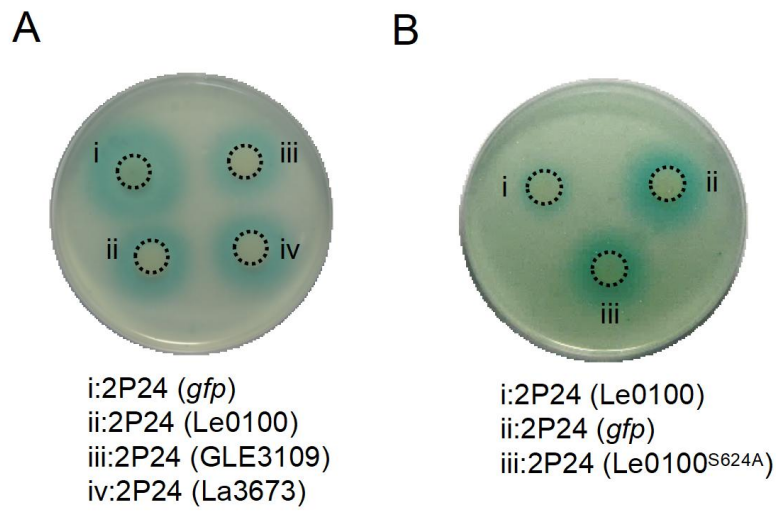

**Figure S15. Representative images showing AHL production of *Pseudomonas fluorescence* 2P24 expressing Le0100 and its two homologous genes (A) as well as its point mutant variant (B). AHL quantification data in panels A and B were shown in Figure 4C and 4D, respectively.**



1  
2  
3  
4  
5  
6  
7  
8  
9  
10  
11

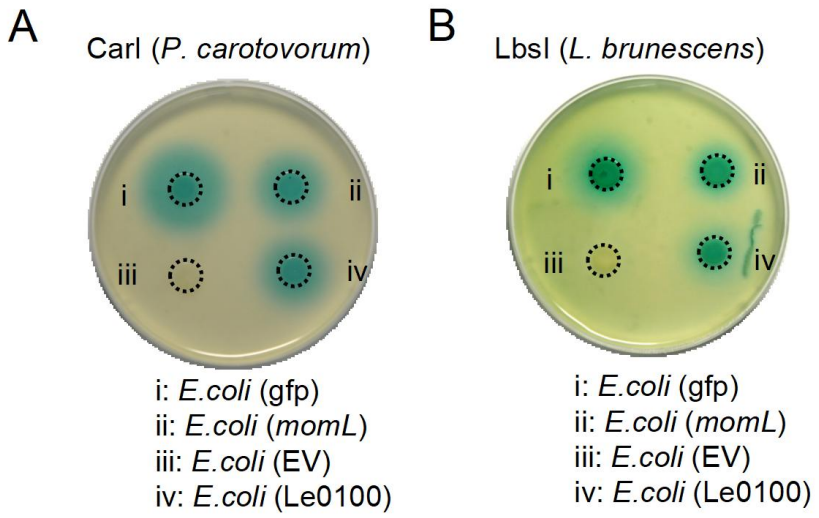

12 **Figure S17. Representative images showing production of AHL in *E. coli***  
13 **co-expressing Le0100 with the AHL synthase CarI (A) or LbsI (B) gene. AHL**  
14 **production was determined by the AHL biosensor JZA1. AHL quantification data in**  
15 **panels A and B were shown in Figure 4E and 4F, respectively.**



## 1 **References**

- 2 1. Qian, G., Hu, B., Jiang, Y. & Liu, F. Identification and characterization of  
3 *Lysobacter enzymogenes* as a biological control agent against some fungal  
4 pathogens. *Agricultural sciences in China* 8:68-75.  
5 [https://doi.org/10.1016/S1671-2927\(09\)60010-9](https://doi.org/10.1016/S1671-2927(09)60010-9).
- 6 2. Wei, H., and L. Zhang. 2006. Quorum-sensing system influences root colonization  
7 and biological control ability in *Pseudomonas fluorescens* 2P24. *Antonie van*  
8 *Leeuwenhoek* 89:267-280. <https://doi.org/10.1007/s10482-005-9028-8>.
- 9 3. Zhu, J., Y. Chai, Z. Zhong, S. Li, and S. C. Winans. 2003. Agrobacterium bioassay  
10 strain for ultrasensitive detection of N-acyl homoserine lactone-type  
11 quorum-sensing Molecules: Detection of Autoinducers in *Mesorhizobium huakuii*.  
12 *Applied and Environmental Microbiology* 69:6949-6953.  
13 <https://doi.org/10.1128/AEM.69.11.6949-6953.2003>.
- 14 4. Xu, G., S. Han, C. Huo, K. Chin, S. Chou, M. Gomelsky, G. Qian, and F. Liu. 2018.  
15 Signaling specificity in the c-di-GMP-dependent network regulating antibiotic  
16 synthesis in *Lysobacter*. *Nucleic Acids Research*.  
17 <https://doi.org/10.1093/nar/gky803>.
- 18 5. Kovach, M. E., P. H. Elzer, D. Steven Hill, G. T. Robertson, M. A. Farris, R. M.  
19 Roop, and K. M. Peterson. 1995. Four new derivatives of the broad-host-range  
20 cloning vector pBBR1MCS, carrying different antibiotic-resistance cassettes. *Gene*  
21 166:175-176. [https://doi.org/10.1016/0378-1119\(95\)00584-1](https://doi.org/10.1016/0378-1119(95)00584-1).
- 22 6. Liao, J., D. Shen, L. Lin, H. Chen, Y. Jin, S. Chou, X. Yu, T. Li, and G. Qian. 2021.  
23 Bacterial quorum sensing quenching activity of *Lysobacter* leucyl aminopeptidase  
24 acts by interacting with autoinducer synthase. *Computational and Structural*  
25 *Biotechnology Journal* 19:6179-6190. <https://doi.org/10.1016/j.csbj.2021.11.017>.

26

27
